# Supplementary material for: Inhaled anti-TSLP antibody fragment, ecleralimab, blocks responses to allergen in mild asthma
Source: PubMed Central journal article supplement — Eur Respir J. 2023 Mar 9;61(3):2201193. doi: 10.1183/13993003.01193-2022 (PMC9996823; doi:10.1183/13993003.01193-2022), 2023-03-09

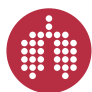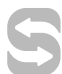

SHAREABLE PDF

# Inhaled anti-TSLP antibody fragment, ecleralimab, blocks responses to allergen in mild asthma

Gail M. Gauvreau<sup>1,14</sup>, Jens M. Hohlfield<sup>2,14</sup>, J. Mark FitzGerald<sup>3,14,†</sup>, Louis-Philippe Boulet<sup>4</sup>, Donald W. Cockcroft<sup>5</sup>, Beth E. Davis<sup>5</sup>, Stephanie Korn<sup>6</sup>, Oliver Kornmann<sup>7</sup>, Richard Leigh<sup>8</sup>, Irvin Mayers<sup>9</sup>, Henrik Watz<sup>10</sup>, Sarah S. Grant<sup>11</sup>, Monish Jain<sup>11</sup>, Maciej Cabanski<sup>11</sup>, Peter E. Pertel<sup>11</sup>, Ieuan Jones<sup>12</sup>, Jean R. Lecot<sup>12</sup>, Hui Cao<sup>13</sup> and Paul M. O'Byrne<sup>14</sup>

<sup>1</sup>Department of Medicine, McMaster University, Hamilton, ON, Canada. <sup>2</sup>Fraunhofer Institute for Toxicology and Experimental Medicine and Hannover Medical School, Hannover, Germany. <sup>3</sup>Centre for Lung Health, University of British Columbia, Vancouver, BC, Canada. <sup>4</sup>Québec Heart and Lung Institute, Laval University, Québec, QC, Canada. <sup>5</sup>Division of Respiriology, Critical Care and Sleep Medicine, Department of Medicine, University of Saskatchewan, Saskatoon, SK, Canada. <sup>6</sup>IKF Pneumologie Mainz and Thoraxklinik, Heidelberg, Germany. <sup>7</sup>IKF Pneumologie Frankfurt, Clinical Research Centre Respiratory Diseases, Frankfurt, Germany. <sup>8</sup>Department of Medicine, Cumming School of Medicine, Calgary, AB, Canada. <sup>9</sup>Division of Pulmonary Medicine, Department of Medicine, Faculty of Medicine and Dentistry, University of Alberta, Edmonton, AB, Canada. <sup>10</sup>Pulmonary Research Institute at Lungen Clinic Grosshansdorf, Airway Research Centre North (ARCN), German Centre for Lung Research (DZL), Grosshansdorf, Germany. <sup>11</sup>Novartis Institutes of Biomedical Research, Cambridge, MA, USA. <sup>12</sup>Novartis Pharma AG, Basel, Switzerland. <sup>13</sup>Novartis Pharmaceuticals Corporation, East Hanover, NJ, USA. <sup>14</sup>These authors contributed equally to this work.

Corresponding author: Gail M. Gauvreau ([gauvreau@mcmaster.ca](mailto:gauvreau@mcmaster.ca))

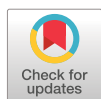

Shareable abstract (@ERSpublications)

**Ecleralimab significantly attenuated allergen-induced airway responses and inflammation in subjects with mild asthma. It was generally safe and well tolerated, suggesting anti-TSLP may be a promising, new therapeutic class for inhaled asthma treatment.** <https://bit.ly/3U294EA>

**Cite this article as:** Gauvreau GM, Hohlfield JM, FitzGerald JM, *et al.* Inhaled anti-TSLP antibody fragment, ecleralimab, blocks responses to allergen in mild asthma. *Eur Respir J* 2023; 61: 2201193 [DOI: 10.1183/13993003.01193-2022].

This single-page version can be shared freely online.

Copyright ©The authors 2023.

This version is distributed under the terms of the Creative Commons Attribution Non-Commercial Licence 4.0. For commercial reproduction rights and permissions contact [permissions@ersnet.org](mailto:permissions@ersnet.org)

This article has an editorial commentary:  
<https://doi.org/10.1183/13993003.02389-2022>

Received: 10 June 2022  
Accepted: 24 Oct 2022

## Abstract

**Background** Thymic stromal lymphopoietin (TSLP) is a key upstream regulator driving allergic inflammatory responses. We evaluated the efficacy and safety of ecleralimab, a potent inhaled neutralising antibody fragment against human TSLP, using allergen inhalation challenge (AIC) in subjects with mild atopic asthma.

**Methods** This was a 12-week, randomised, double-blind, placebo-controlled, parallel-design, multicentre allergen bronchoprovocation study conducted at 10 centres across Canada and Germany. Subjects aged 18–60 years with stable mild atopic asthma were randomised (1:1) to receive 4 mg once-daily inhaled ecleralimab or placebo. Primary end-points were the allergen-induced change in forced expiratory volume in 1 s (FEV<sub>1</sub>) during the late asthmatic response (LAR) measured by area under the curve (AUC<sub>3–7h</sub>) and maximum percentage decrease (LAR%) on day 84, and the safety of ecleralimab. Allergen-induced early asthmatic response (EAR), sputum eosinophils and fractional exhaled nitric oxide (F<sub>ENO</sub>) were secondary and exploratory end-points.

**Results** 28 subjects were randomised to ecleralimab (n=15) or placebo (n=13). On day 84, ecleralimab significantly attenuated LAR AUC<sub>3–7h</sub> by 64% (p=0.008), LAR% by 48% (p=0.029), and allergen-induced sputum eosinophils by 64% at 7 h (p=0.011) and by 52% at 24 h (p=0.047) post-challenge. Ecleralimab also numerically reduced EAR AUC<sub>0–2h</sub> (p=0.097) and EAR% (p=0.105). F<sub>ENO</sub> levels were significantly reduced from baseline throughout the study (p<0.05), except at 24 h post-allergen (day 43 and day 85). Overall, ecleralimab was safe and well tolerated.

**Conclusion** Ecleralimab significantly attenuated allergen-induced bronchoconstriction and airway inflammation, and was safe in subjects with mild atopic asthma.

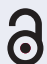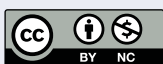

Supplement: ERJ-01193-2022.Shareable.pdf [file ERJ-01193-2022.Shareable.pdf]
